# Supplementary material
Source: MDPI journal article supplement (https://www.mdpi.com/2071-1050/15/6/4814)
Supplement: s1 [file s1]

# Implementing IPCC 2019 Guidelines into a National Inventory: Impacts of Key Changes in Austrian Cattle and Pig Farming

Stefan J. Hörtenhuber <sup>\*,†</sup>, Verena Größbacher <sup>†</sup>, Lisa Schanz and Werner J. Zollitsch

Department of Sustainable Agricultural Systems, Institute of Livestock Sciences, University of Natural

Resources and Life Sciences Vienna, 1180 Vienna, Austria; verena.groessbacher@boku.ac.at (V.G.); lisa.schanz@boku.ac.at (L.S.); werner.zollitsch@boku.ac.at (W.J.Z.)

\* Correspondence: stefan.hoertenhuber@boku.ac.at

† These authors contributed equally to this work.

**Supplementary Material Table S1.** Parameters and functions as well as their data sources relevant for calculation of enteric CH<sub>4</sub> emissions, N<sub>ex</sub> and VS<sub>ex</sub> for cattle and pigs.

| Parameters and functions                                                             |                                                                                                                                                                                                                                                                                                                                                                                                                                                                             | Data sources for cattle // pigs |
|--------------------------------------------------------------------------------------|-----------------------------------------------------------------------------------------------------------------------------------------------------------------------------------------------------------------------------------------------------------------------------------------------------------------------------------------------------------------------------------------------------------------------------------------------------------------------------|---------------------------------|
| Body mass characteristics                                                            |                                                                                                                                                                                                                                                                                                                                                                                                                                                                             |                                 |
| Growth curves                                                                        | Brandstätter et al. 2003; Egger-Danner et al. 2016; Fürst 2020; Gruber et al. 2001, 2015, 2021; Gruber 2021; Häusler et al. 2015; Jauschnegg 1994; Bayrische Landesanstalt für Landwirtschaft 2020; Mader 2021; Neumayr 2012; Statistics Austria 2021; Velik et al., 2019 // Bayrische Landesanstalt für Landwirtschaft 2021; Verband Österreichischer Schweinebauern 2021; Statistics Austria 2021; Kirchgeßner 2008                                                       |                                 |
| Body mass curves                                                                     |                                                                                                                                                                                                                                                                                                                                                                                                                                                                             |                                 |
| Daily weight gains                                                                   |                                                                                                                                                                                                                                                                                                                                                                                                                                                                             |                                 |
| Final body mass                                                                      |                                                                                                                                                                                                                                                                                                                                                                                                                                                                             |                                 |
| Diet parameters' characteristics                                                     |                                                                                                                                                                                                                                                                                                                                                                                                                                                                             |                                 |
| Crude protein content                                                                | Egger-Danner et al. 2016; Gruber et al. 2021; Gruber & Steinwender 1992; Gruber & Pötsch 2006; Gruber & Steinwidder 1996; Klein-Jöbstl et al. 2015; LfL 2020; Marcé et al. 2010; Neumayr 2012; Resch et al. 2006; Rinnhofer 2008; Stangl et al. 2014; Steinwidder 2003; Steinwidder & Guggenberger 2003; Steinwidder & Häusler 2004 // National data on feed samples (Rosenau Laboratory), see Reiter et al. 2021; DLG Feed Tables for Pigs, see Staudacher & Potthast 2014 |                                 |
| Ash content                                                                          |                                                                                                                                                                                                                                                                                                                                                                                                                                                                             |                                 |
| Dry matter (DM) content                                                              |                                                                                                                                                                                                                                                                                                                                                                                                                                                                             |                                 |
| Gross energy content                                                                 |                                                                                                                                                                                                                                                                                                                                                                                                                                                                             |                                 |
| Performance-related characteristics                                                  |                                                                                                                                                                                                                                                                                                                                                                                                                                                                             |                                 |
| N retention                                                                          | Gavrilova et al. 2019; AgrarMarkt Austria 2021; // Gavrilova et al. 2019; Kirchgeßner 2008; Dämmgen et al. 2012                                                                                                                                                                                                                                                                                                                                                             |                                 |
| Diet- and performance-specific methane conversion factors (Y <sub>m</sub> )          |                                                                                                                                                                                                                                                                                                                                                                                                                                                                             |                                 |
| Net energy requirements...                                                           |                                                                                                                                                                                                                                                                                                                                                                                                                                                                             |                                 |
| ... for maintenance                                                                  | Gavrilova et al. 2019 (and sources above) // Verband Österreichischer Schweinebauern 2021; Statistics Austria 2021; Kirchgeßner 2008; National data on feed samples (Rosenau Laboratory), see Reiter et al. 2021; DLG Feed Tables for Pigs, see Staudacher & Potthast 2014                                                                                                                                                                                                  |                                 |
| ... for activity (increased physical exercise e.g. on pasture or on alpine pastures) |                                                                                                                                                                                                                                                                                                                                                                                                                                                                             |                                 |
| ... for growth                                                                       |                                                                                                                                                                                                                                                                                                                                                                                                                                                                             |                                 |
| ... for pregnancy                                                                    |                                                                                                                                                                                                                                                                                                                                                                                                                                                                             |                                 |
| ... for (milk) yield                                                                 |                                                                                                                                                                                                                                                                                                                                                                                                                                                                             |                                 |

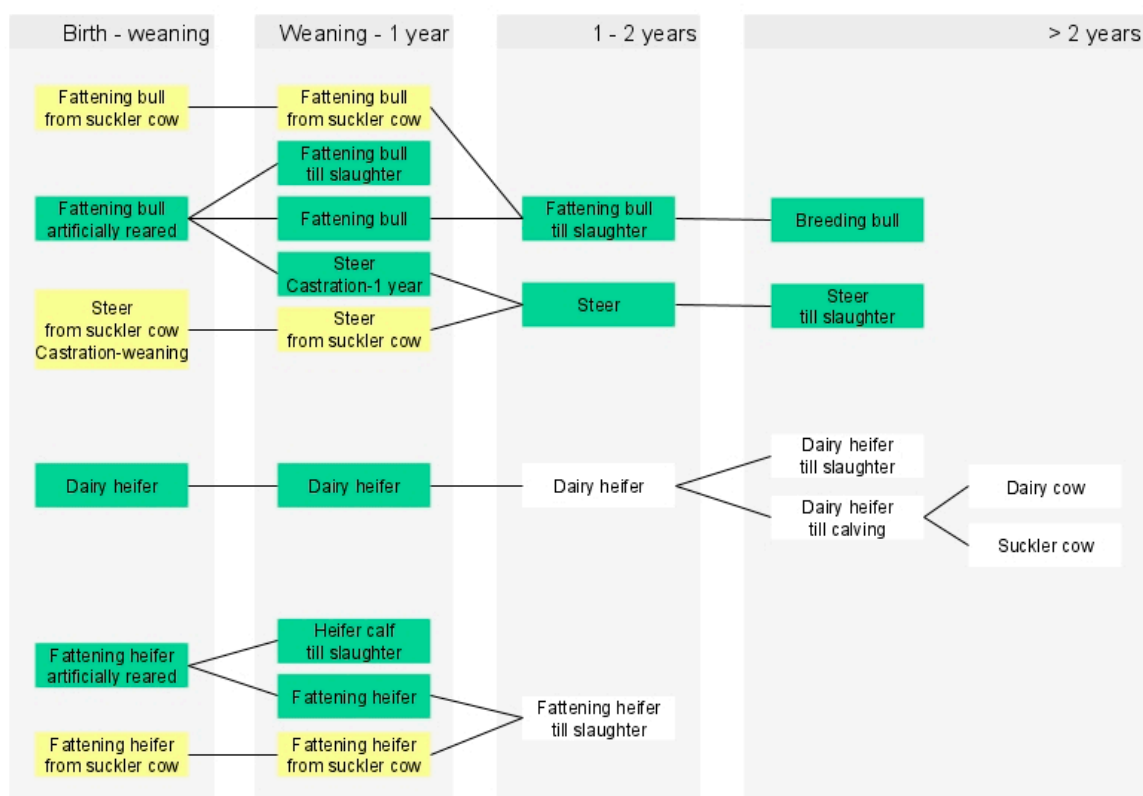

**Supplementary Material Figure S1.** Differentiation of cattle categories for the updated IPCC-2019-based analysis.

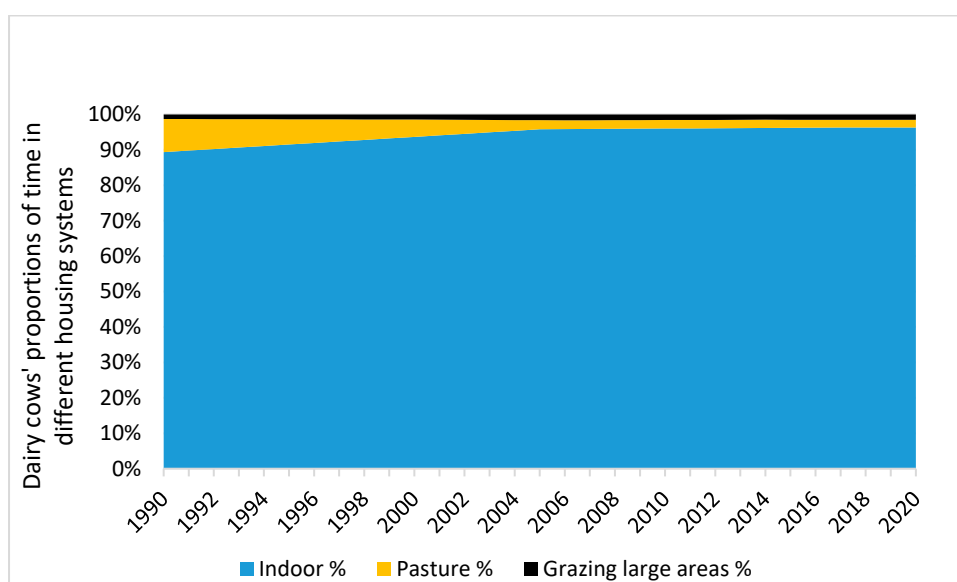

**Supplementary Material Figure S2.** Share of dairy cattle indoors, on pasture and on alpine pasture (equal to “Grazing large areas” according to IPCC 2019) from 1990 to 2020.

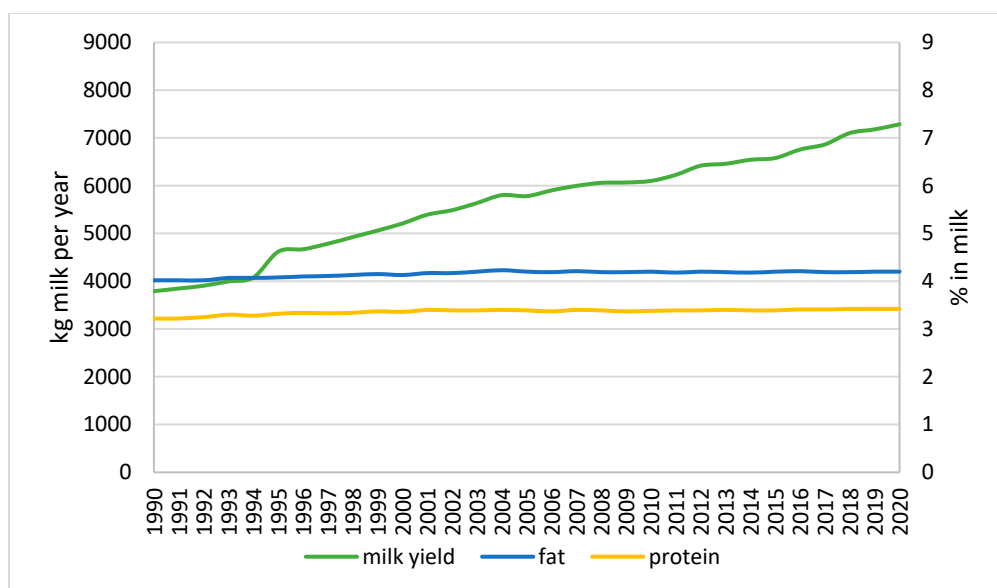

**Supplementary Material Figure S3.** Average milk yield in kg per animal and day (y1 axis) and the average fat and protein content of the milk (y2 axis) of dairy cows between 1990 and 2020.

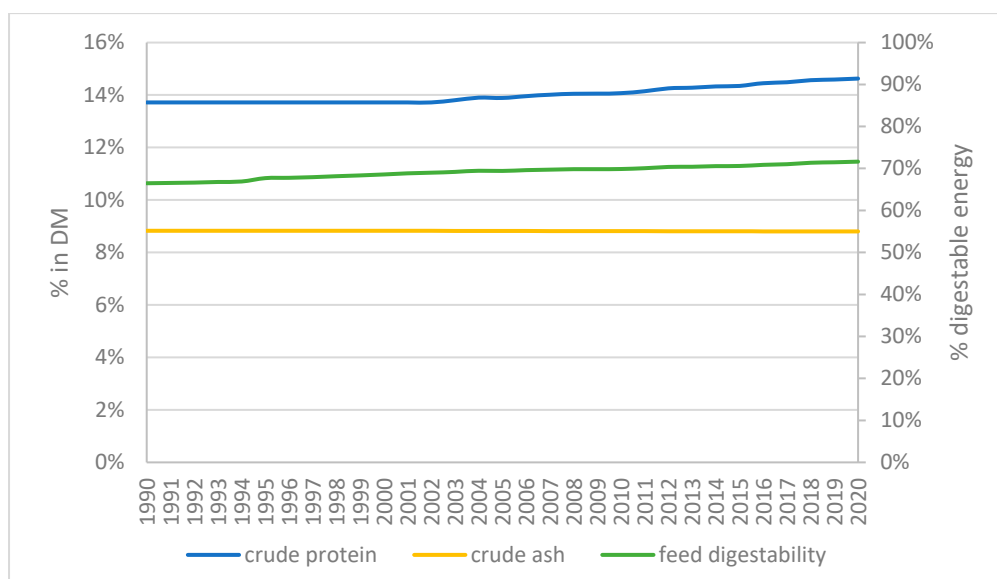

**Supplementary Material Figure S4.** The proportion of crude protein and crude ash in the dry matter (y1 axis) and the feed digestibility (y2 axis) of dairy cows between 1990 and 2020.

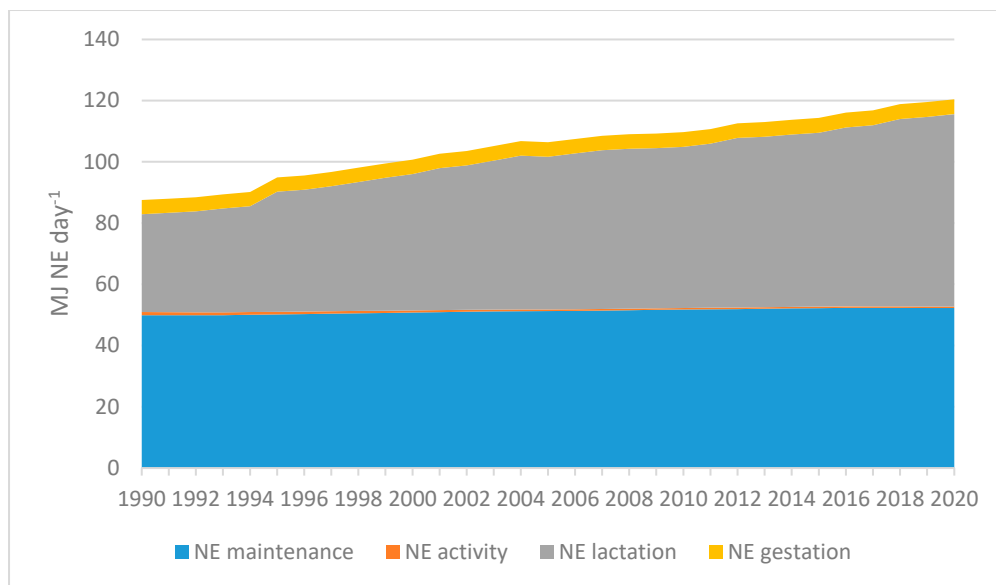

**Supplementary Material Figure S5.** Calculated net energy requirements for maintenance, activity, lactation and pregnancy of dairy cows between 1990 and 2020.

**Supplementary Material Table S2.** Uncertainty ranges, expressed as standard deviations, calculated for the results derived with the IPCC-2019 method for the years 1990, 2005 and 2020.

|                                             | Dairy cows | Other cattle | Breeding pigs | Fattening pigs |
|---------------------------------------------|------------|--------------|---------------|----------------|
| Enteric CH <sub>4</sub> (per head and year) |            |              |               |                |
| 1990                                        | ± 10.3 %   | ± 10.4 %     | ± 20.6 %      | ± 20.2 %       |
| 2005                                        | ± 10.1 %   | ± 10.1 %     | ± 20.2 %      | ± 20.4 %       |
| 2020                                        | ± 10.6 %   | ± 10.6 %     | ± 20.6 %      | ± 20.0 %       |
| N <sub>ex</sub> (per head and year)         |            |              |               |                |
| 1990                                        | ± 8.7 %    | ± 8.5 %      | ± 7.2 %       | ± 7.0 %        |
| 2005                                        | ± 8.8 %    | ± 8.5 %      | ± 6.9 %       | ± 7.2 %        |
| 2020                                        | ± 9.7 %    | ± 8.5 %      | ± 7.1 %       | ± 7.5 %        |
| VS <sub>ex</sub> (per head and year)        |            |              |               |                |
| 1990                                        | ± 8.4 %    | ± 8.4 %      | ± 4.9 %       | ± 4.8 %        |
| 2005                                        | ± 7.9 %    | ± 8.4 %      | ± 4.8 %       | ± 4.7 %        |
| 2020                                        | ± 7.8 %    | ± 8.4 %      | ± 4.7 %       | ± 4.9 %        |

**Supplementary Material Table S3.** Relative changes of protein (N) retention and of emissions per head and year and per kg CP of enteric CH<sub>4</sub>, N<sub>ex</sub> and VS<sub>ex</sub> in 2020 compared to 1990 for different animal categories.

|                                                               | % Difference (2020 to 1990) |              |               |                |
|---------------------------------------------------------------|-----------------------------|--------------|---------------|----------------|
|                                                               | Dairy cows                  | Other cattle | Breeding pigs | Fattening pigs |
| kg crude protein (N) retention per animal                     | +99.0 %                     | +12.1 %      | +32.7 %       | +13.2 %        |
| CH <sub>4</sub> kg <sup>-1</sup> per head and year            | +20.4 %                     | +19.1 %      | +17.1 %       | +10.2 %        |
| N <sub>ex</sub> kg <sup>-1</sup> per head and year            | +17.4 %                     | +16.4 %      | -4.7 %        | -8.9 %         |
| VS <sub>ex</sub> kg <sup>-1</sup> per head and year           | +7.1 %                      | +26.0 %      | 13.2 %        | -0.7 %         |
| CH <sub>4</sub> kg <sup>-1</sup> milk CP and/or body mass CP  | -39.5 %                     | -29.6 %      | -11.8 %       | -2.6 %         |
| N <sub>ex</sub> kg <sup>-1</sup> milk CP and/or body mass CP  | -41.0 %                     | -31.2 %      | -28.2 %       | -19.5 %        |
| VS <sub>ex</sub> kg <sup>-1</sup> milk CP and/or body mass CP | -46.2 %                     | -25.5 %      | -14.7 %       | -12.3 %        |

## References

- AgrarMarkt Austria (AMA). *Daten und Fakten der für den Bereich Milch und Milchprodukte (Facts and figures for milk and dairy products)*; AMA: Vienna, Austria, 2021; Available online: [https://www.ama.at/getattachment/0b786879-6c75-4f7b-8c80-25bca0c8c39e/1\\_Fett-und-Eiwei%3%9fgehalt-der-Anlieferungsmilch-1991-2019.pdf](https://www.ama.at/getattachment/0b786879-6c75-4f7b-8c80-25bca0c8c39e/1_Fett-und-Eiwei%3%9fgehalt-der-Anlieferungsmilch-1991-2019.pdf) (accessed on 10 January 2023).
- Bayrische Landesanstalt für Landwirtschaft (LfL). *Futterberechnung für Schweine*, 26<sup>th</sup> ed.; LfL: Freising, Germany, 2021; Available online: [https://www.lfl.bayern.de/mam/cms07/publikationen/daten/informationen/futterwerttabelle\\_schwein\\_lfl-information.pdf](https://www.lfl.bayern.de/mam/cms07/publikationen/daten/informationen/futterwerttabelle_schwein_lfl-information.pdf) (accessed on 10 January 2023).
- Bayrische Landesanstalt für Landwirtschaft (LfL). *Gruber Tabelle zur Fütterung in der Rindermast*. 25<sup>th</sup> ed.; LfL: Freising, Germany, 2020; Available online: [https://www.lfl.bayern.de/mam/cms07/publikationen/daten/informationen/gruber\\_tabelle\\_rindermast-2021\\_lfl-information.pdf](https://www.lfl.bayern.de/mam/cms07/publikationen/daten/informationen/gruber_tabelle_rindermast-2021_lfl-information.pdf) (accessed on 10 January 2023).
- Brandstätter, B.; Eichler, S.; Gassner, B.; Griesmann, S.; Harm, A.; Höller, B.; Kobler, B.; Mandl, J.; Mlnarik, A.; Peyerl, H.; Pfeifenberger, M.; Pussnig, S.; Raschel, A.; Roitner-Schobesberger, B.; Taferner, K.; Weinberger, G. (2003) *Biorindfleisch. Richtlinien - Produktion - Struktur - Markt. Interdisziplinäres Projekt Ökonomik*; BOKU: Vienna, Austria, 2003; Available online: [https://boku.ac.at/fileadmin/data/H03000/H73000/H73300/pub/Biolandbau/2003\\_Biorindfleisch.pdf](https://boku.ac.at/fileadmin/data/H03000/H73000/H73300/pub/Biolandbau/2003_Biorindfleisch.pdf) (accessed on 10 January 2023).
- Dämmgen, U., Schulz, J.; Kleine Klausung, H.; Hutchings, N.J.; Haenel, H.-D.; Rösemann, C. Enteric Methane emissions from German pigs. *Agric. For. Res.* 2012, 3, 83–96.
- Egger-Danner, C.; Fürst-Waltl, B.; Fürst, C.; Gruber, L.; Hörtenhuber, S.; Koeck, A.; Ledinek, M.; Pfeiffer, C.; Steininger, F.; Weißensteiner, R.; Willam, A.; Zollitsch, W.; Zottl, K. *Efficient Cow – Analyse und Optimierung der Produktionseffizienz und der Umweltwirkung in der österreichischen Rinderwirtschaft*; Zentrale Arbeitsgemeinschaft österreichischer Rinderzüchter (ZAR): Vienna, Austria, 2016; Available online: [https://dafne.at/content/report\\_release/bf039db1-6192-44b1-a1e8-056ba5c48965\\_0.pdf](https://dafne.at/content/report_release/bf039db1-6192-44b1-a1e8-056ba5c48965_0.pdf) (accessed on 10 January 2023).
- Fürst, C. (Rinderzucht Austria, Cattle breeding association, Vienna, Austria). Personal communication, 2020.
- Gavrilova, O.; Leip, A.; Dong, H.; MacDonald, J. D.; Gomez Bravo, C. A.; Amon, B.; Barahona Rosales, R.; del Prado, A.; de Lima, M. A.; Oyhantçabal, W.; van der Weerden, T. J.; Widiawat, Y.; Bannink, A.; Beauchemin, K.; Clark, H.; Leytem, A.; Kebreab, E.; Ngwabie, N. M.; Opio, C. I.; ... Intergovernmental Panel on Climate Change (IPCC). *Emissions from Livestock and Manure Management. 2019 Refinement to the 2006 IPCC Guidelines for National Greenhouse Gas Inventories (Vol. 4)*; IPCC: Kyoto, Japan, 2019.
- Gruber, L. (HBLFA Raumberg-Gumpenstein, Raumberg, Austria). Personal communication, 2021.
- Gruber, L.; Ettle, T.; Schwarz, F.J.; Royer, M.; Pries, M.; Fischer, B.; Jilg, T.; Koch, C.; Terler, G.; Meyer, U.; Hammon, H.M.; Kunz, H.-J.; Guggenberger, T. *Untersuchungen zur Futteraufnahme und zum Energieaufwand von*

- Aufzuchttrindern der Rasse Fleckvieh und Holstein von der Geburt bis 220 kg Lebendmasse*. 48. Viehwirtschaftliche Fachtagung. HBLFA Raumberg-Gumpenstein, Gumpenstein, Austria, 24th/25th March 2021, pp. 145–170.
- Gruber, L.; Pötsch, E.M. Calculation of nitrogen excretion of dairy cows in Austria. *Die Bodenkultur* 2006, 57(1–4), 65–72.
- Gruber, L.; Steinwender, R. Nähr- und Mineralstoffversorgung von Milchkühen aus dem Grundfutter – Ergebnisse einer Praxiserhebung in landwirtschaftlichen Betrieben Österreichs. *Die Bodenkultur* 1992, 43, pp. 65–79.
- Gruber, L.; Steinwider, A. Influence of nutrition on nitrogen and phosphorus excretion of livestock - model calculations on the basis of a literature review. *Die Bodenkultur* 1996, 47(4), 255–277.
- Gruber, L.; Urdl, M.; Obritzhauser, W.; Schauer, A.; Häusler, J. Energie- und Nährstoffversorgung der Milchkuh in der Trockenstehzeit und zu Laktationsbeginn: Produktionsdaten und Stoffwechsel. 42. Viehwirtschaftliche Fachtagung 2015. HBLFA Raumberg-Gumpenstein, Gumpenstein, Austria, 25th/26th March 2015, p. 95–125.
- Häusler, J. *Das Leistungspotenzial von Fleckviehmutterkühen - Versuchsergebnisse des LFZ Raumberg-Gumpenstein*. Fachtag Erfolgreiche Mutterkuhhaltung. Fachschule Warth, Warth, Austria, 2009.
- Jauschnegg, H. Schätzung von Rumpflänge, Widerristhöhe und Schulterbreite auf der Basis des Gewichtes beim Rind. Diploma thesis, University of Natural Resources and Life Science Vienna, 1994.
- Kirchgessner, M.; Roth, F.X.; Schwarz, F.J.; Stangl, G.I. *Tierernährung*. 12th ed.; DLG: Frankfurt, Germany, 2008; p. 635.
- Klein-Jöbstl, D.; Arnholdt, T.; Sturmlechner, F.; Iwersen, M.; Drillich, M. Results of an online questionnaire to survey calf management practices on dairy cattle breeding farms in Austria and to estimate differences in disease incidences depending on farm structure and management practices. *Acta Veterinaria Scandinavica* 2015, 57(1), 1–10. doi: 10.1186/S13028-015-0134-Y.
- Mader, C. (Österreichische Fleischkontrolle, St. Pölten, Austria). Personal communication, 2021.
- Marcé, C.; Guatteo, R.; Bareille, N.; Fourichon, C. Dairy calf housing systems across Europe and risk for calf infectious diseases. *Animal* 2010, 4(9), 1588–1596. doi: 10.1017/S1751731110000650
- Neumayr, C. Treibhausgasemissionen von Systemen der Rind- und Lammfleischerzeugung. Diploma thesis, University of Natural Resources and Life Science Vienna, 2012.
- Reiter, E.; Wilhelmer, C.; Mechtler, K.; Wagner, M.; Lippl, M.; Alber, O.; Dersch, G.; Felder, H. *Endbericht Mais XP – Bewertung des Proteingehaltes sowie der Aminosäurezusammensetzung des Österreichischen Körnermaissortiments*; Bundesministerium für Landwirtschaft, Regionen und Tourismus (Federal Ministry of Agriculture, Regions and Tourism): Vienna, Austria, 2021; Available online: [https://dafne.at/content/report\\_release/fc1c0648-bbca-4b03-b73c-3f02de6cc406\\_0.pdf](https://dafne.at/content/report_release/fc1c0648-bbca-4b03-b73c-3f02de6cc406_0.pdf) (accessed on 10 January 2023).
- Resch, R.; Guggenberger, T.; Wiedner, G.; Kasal, A.; Wurm, K.; Gruber, L.; Ringdorfer, F.; Buchgraber, K. Futterwerttabellen für das Grundfutter im Alpenraum. *Der Fortschrittliche Landwirt* 2006, 84(24), p. 20.
- Rinnhofer, B. Einflüsse der Haltungsumwelt und der Genetik auf das gegenseitige Besaugen beim Rind. Diploma thesis, University of Natural Resources and Life Science Vienna, 2008.
- Stangl G.I.; Schwarz, F.J.; Roth, F.X.; Südekum, K.-H.; Eder, K. *Kirchgeßner Tierernährung. Leitfaden für Studium, Beratung und Praxis*. 14th ed.; DLG: Frankfurt, Germany, 2014; p. 660.
- Statistics Austria. *Lebend- und Schlachtgewichte*; Statistics Austria: Vienna, Austria, 2021; Available online: [https://www.statistik.at/fileadmin/publications/Durchschnittliche\\_Lebend-\\_und\\_Schlachtgewichte\\_2020.pdf](https://www.statistik.at/fileadmin/publications/Durchschnittliche_Lebend-_und_Schlachtgewichte_2020.pdf) (accessed on 10 January 2023).
- Staudacher, W.; Potthast, V. *DLG-Futterwerttabellen – Schweine (DLG feeding value table – pigs)*, 7th ed.; DLG: Frankfurt, Germany, 2014; p. 68.
- Steinwider, A.; Guggenberger, T. Erhebungen zur Futteraufnahme und Nährstoffversorgung von Milchkühen sowie Nährstoffbilanzierung auf Grünlandbetrieben in Österreich. *Bodenkultur* 2003, 54(1), pp. 49–66.
- Steinwider, A.; Häusler, J. *Anforderungen an die Fütterung im Mutterkuhbetrieb*. 31. Viehwirtschaftliche Fachtagung. BAL Raumberg-Gumpenstein, Gumpenstein, Austria, 27th/28th April 2004, p. 1–16.
- Velik, M.; Eingang, D.; Kaufmann, J.; Kitzer, R. *Fleischqualität österreichischer Rindfleisch-Markenprogramme (Ochse, Kalbin, Jungrind) – Ergebnisse einer Stichprobenerhebung*. 36. Viehwirtschaftliche Fachtagung, LFZ Raumberg-Gumpenstein, Gumpenstein, Austria, 16th/17th April 2009, p. 85–93.
- Verband Österreichischer Schweinebauern (VÖS; Association of Austrian Pig Farmers). *Jahresbericht 2020 (annual report 2020)*; VÖS: Vienna, Austria, 2021; Available online: [https://www.voes-online.at/images/VS\\_Jahresbericht\\_2020.pdf](https://www.voes-online.at/images/VS_Jahresbericht_2020.pdf) (accessed on 10 January 2023).
